# Supplementary material for: The Citation Merit of Scientific Publications
Source: PLoS One. 2012 Nov 13;7(11):e49156. doi: 10.1371/journal.pone.0049156 (PMC3496740; doi:10.1371/journal.pone.0049156)
Supplement: Tables S1 — Analysis of the 40 countries with the largest number of papers in the corresponding field. (XLSX) [file pone.0049156.s001.xlsx]

## Sheet: Appendix
	THE CITATION MERIT OF SCIENTIFIC PUBLICATIONS
	Joan Crespo, Ignacio Ortuño-Ortín and Javier Ruiz-Castillo
	Appendix
	Each table contains the 40 countries with the largest number of papers in the corresponding field.
	Columns:
	1) Country
	2) Number of papers: Number of scientific articles published in 1998.
	3) h-index: The value of the h-index for the corresponding set of articles.
	4) Percentile h: The citation merit, qn, when the citation impact indicator is the h-index.
	5) Mean citation: The mean citation received until year 2007.
	6) Percentile Mean: The citation merit, qn, when the citation impact indicator is the mean citation. It is calculated using the approximation explained in the paper. The number of random subsets is 100.000 for Physiscs and 10.000 for the rest of fields.
	7) and 8): The 95% confidence interval for the percentile mean in column 6)

## Sheet: 1.Biology&Biochemistry
Country	Number of papers	h-index	Percentile h	Mean citation	Percentile mean	confidence interval	confidence interval
USA	16743	195	100	32.7412	100	100	100
JAPAN	5614	110	0	20.0328	0	0	0
GERMANY	3845	106	43.8115	27.4819	99.7	99.5928	99.8072
ENGLAND	3681	115	99.9223	27.2217	99.6	99.4763	99.7237
FRANCE	3240	97	10.5374	25.7148	94.8	94.3648	95.2352
CANADA	2074	92	94.8526	27.7035	97.5	97.194	97.806
ITALY	1998	71	0	17.5726	0	0	0
SPAIN	1274	59	0	18.135	0	0	0
SWEDEN	1201	75	86.1166	26.9659	98	97.7256	98.2744
AUSTRALIA	1147	72	66.394	24.1299	80	79.216	80.784
NETHERLANDS	1085	74	94.0504	27.6	97.5	97.194	97.806
RUSSIA	962	41	0	10.3212	0	0	0
SWITZERLAND	872	79	100	31.4851	97.8	97.5125	98.0875
CHINA	857	32	0	7.63711	0	0	0
INDIA	817	34	0	8.16279	0	0	0
SOUTH KOREA	710	43	0	12.9507	0	0	0
SCOTLAND	698	65	97.4541	27.414	98.2	97.9394	98.4606
BELGIUM	640	60	79.9873	24.1031	73.9	73.0392	74.7608
POLAND	606	39	0	10.4191	0	0	0
DENMARK	600	56	45.113	25.1383	88.6	87.9771	89.2229
BRAZIL	574	39	0	11.4826	0	0	0
ISRAEL	545	57	83.8294	23.1229	49.9	48.92	50.88
AUSTRIA	409	44	2.87743	21.0367	10.3	9.70424	10.8958
FINLAND	371	48	68.16	24.6361	77.3	76.479	78.121
TAIWAN	348	34	0	14.6322	0	0	0
ARGENTINA	339	29	0	12.5959	0	0	0
CZECH REPUBLIC	274	30	0	13.8285	0	0	0
NORWAY	273	35	0.333004	18.3004	0.3	0.192808	0.407192
HUNGARY	251	30	0	13.9841	0	0	0
MEXICO	241	29	0	11.1328	0	0	0
SLOVAKIA	204	19	0	7.41176	0	0	0
GREECE	200	25	0	12.205	0	0	0
NEW ZEALAND	190	34	27.2014	20.7632	15	14.3001	15.6999
IRELAND	184	30	0	76.9402	99.5	99.3618	99.6382
TURKEY	178	22	0	9.91573	0	0	0
WALES	147	31	0	21.5986	29.4	28.507	30.293
PORTUGAL	145	28	5.89497	16.3448	0.2	0.112434	0.287566
SOUTH AFRICA	144	25	0.1548	16.4583	0.2	0.112434	0.287566
BULGARIA	135	16	0	7.23704	0	0	0
CHILE	114	19	0	11.7105	0	0	0

## Sheet: 2.MoleculaBiology&Genetics
Country	number of papers	h-index	percentile h	mean citation	percentile mean	confidence interval	confidence interval
USA	9296	263	100	53.8662	100	100	100
JAPAN	2216	123	0.537734	33.1015	0	0	0
GERMANY	2084	137	96.5764	43.5024	98.4	98.1541	98.6459
ENGLAND	1783	137	99.9876	49.7426	100	100	100
FRANCE	1598	117	48.607	41.4837	81.5	80.7389	82.2611
CANADA	1085	114	99.9693	45.929	99.6	99.4763	99.7237
ITALY	897	82	0.327243	33.1628	0.2	0.112434	0.287566
NETHERLANDS	587	79	78.2131	42.3986	81.9	81.1454	82.6546
RUSSIA	523	36	8.20869e-37	9.52581	0	0	0
SPAIN	520	57	6.66111e-05	26.6019	0	0	0
SWITZERLAND	513	84	99.9537	54.8168	100	100	100
AUSTRALIA	513	63	0.356005	33.7758	2.6	2.2881	2.9119
SWEDEN	441	65	24.4209	42.0159	77.1	76.2764	77.9236
SCOTLAND	334	70	99.9423	52.1377	99.3	99.1366	99.4634
BELGIUM	310	56	34.7848	37.4871	30.1	29.201	30.999
ISRAEL	295	62	97.3185	44.1322	84.5	83.7907	85.2093
BRAZIL	257	29	6.67251e-17	13.2646	0	0	0
DENMARK	208	50	83.1971	39.976	56.3	55.3278	57.2722
INDIA	199	25	2.92099e-15	12.7286	0	0	0
FINLAND	199	50	90.4459	46.2111	89.6	89.0017	90.1983
AUSTRIA	175	46	83.4798	43.0229	74.8	73.949	75.651
CHINA	145	29	0.00369082	21.2138	0	0	0
ARGENTINA	141	20	8.93618e-14	10.6596	0	0	0
SOUTH KOREA	131	25	3.87865e-05	16.8931	0	0	0
POLAND	131	26	0.000350773	19.9618	0	0	0
NORWAY	125	36	46.9148	34.272	22.6	21.7803	23.4197
TAIWAN	118	26	0.0103275	25.5509	0.2	0.112434	0.287566
MEXICO	91	23	0.0672157	19.033	0	0	0
HUNGARY	85	22	0.0651327	23.3529	0.1	0.0380504	0.16195
CZECH REPUBLIC	79	24	3.76924	24.8861	1.5	1.26176	1.73824
WALES	68	25	36.766	33.5735	25.9	25.0414	26.7586
NEW ZEALAND	65	24	31.1982	25.0462	2.1	1.81897	2.38103
GREECE	60	22	18.1991	28.9667	12.6	11.9496	13.2504
SOUTH AFRICA	56	16	0.0223462	18.3571	0.1	0.0380504	0.16195
TURKEY	53	19	5.88143	22.6415	1.2	0.986585	1.41342
CHILE	45	16	1.56752	16.9555	0.1	0.0380504	0.16195
SINGAPORE	44	21	72.1672	61.7273	95.9	95.5114	96.2886
PORTUGAL	44	19	33.8862	30.6364	21.7	20.8921	22.5079
SLOVAKIA	39	14	0.762902	14.8974	0	0	0
IRELAND	35	20	93.3912	33.5714	34.9	33.9658	35.8342

## Sheet: 3.Pharmacology&Toxicology
Country	number of papers	h-index	percentile h	mean citation	percentile mean	confidence interval	confidence interval
USA	3493	88	100	18.9559	100	100	100
JAPAN	1803	51	0.00464872	12.0477	0	0	0
GERMANY	1171	55	93.9539	14.2844	57.9	56.9323	58.8677
ENGLAND	908	55	99.9625	19.4306	100	100	100
FRANCE	805	49	94.6237	15.0124	87.6	86.954	88.246
ITALY	668	42	28.9022	13.7081	29.4	28.507	30.293
CANADA	456	40	85.53	14.818	76.1	75.2641	76.9359
SPAIN	328	34	59.9899	13.7927	36.8	35.8548	37.7452
NETHERLANDS	317	35	81.7363	16.3186	96.9	96.5603	97.2397
SOUTH KOREA	299	27	0.332502	11.1137	0.3	0.192808	0.407192
SWEDEN	297	39	99.9408	20.0202	100	100	100
AUSTRALIA	296	31	27.8587	14.7399	68.9	67.9927	69.8073
CHINA	293	19	1.66952e-11	5.66553	0	0	0
INDIA	248	21	7.60025e-05	8.91935	0	0	0
SWITZERLAND	221	41	100	24.5701	100	100	100
BRAZIL	196	26	25.8319	13.4133	34.5	33.5683	35.4317
POLAND	184	19	0.00211947	8.57609	0	0	0
TAIWAN	178	21	0.348725	10.4719	0.4	0.276287	0.523713
BELGIUM	177	23	5.60819	13.0452	23.9	23.0641	24.7359
TURKEY	153	17	0.000914488	8.80392	0	0	0
FINLAND	138	23	42.6262	15.1014	73.2	72.3319	74.0681
SCOTLAND	133	31	99.9948	21.0301	100	100	100
DENMARK	122	26	97.3975	19.0574	99.6	99.4763	99.7237
HUNGARY	110	19	13.0768	10.2727	1.2	0.986585	1.41342
AUSTRIA	89	22	93.8653	13.8315	45.4	44.4242	46.3758
EGYPT	88	13	0.00772017	6.71591	0	0	0
MEXICO	74	14	1.4132	11.9324	16.6	15.8707	17.3293
NEW ZEALAND	70	24	99.9901	23.2286	100	100	100
ARGENTINA	69	14	3.30258	11.942	17.5	16.7553	18.2447
NORWAY	63	15	22.6574	11.8254	16.5	15.7725	17.2275
CZECH REPUBLIC	60	12	0.679546	7.23333	0	0	0
ISRAEL	59	22	99.977	22.322	99.8	99.7124	99.8876
GREECE	55	14	23.2634	13.5455	44.2	43.2266	45.1734
SOUTH AFRICA	44	14	61.9806	13.25	41.6	40.6339	42.5661
BULGARIA	41	8	0.014297	4.65854	0	0	0
SAUDI ARABIA	40	11	10.5536	8.3	1	0.804982	1.19502
NIGERIA	39	7	0.00111314	4.07692	0	0	0
IRELAND	37	15	95.5694	18.3243	90	89.412	90.588
SINGAPORE	37	10	5.34727	6.18919	0	0	0
THAILAND	37	12	41.9362	11.6486	23.7	22.8665	24.5335

## Sheet: 4.Immunology
Country	number of papers	h-index	percentile h	mean citation	percentile mean	confidence interval	confidence interval
USA	4543	136	100	35.3427	100	100	100
JAPAN	932	63	0.000622612	24.4442	0	0	0
ENGLAND	926	78	94.9093	31.4881	94.7	94.2609	95.1391
GERMANY	817	74	87.6368	32.4994	97.3	96.9823	97.6177
FRANCE	716	71	88.5768	29.8603	68.1	67.1865	69.0135
ITALY	490	61	76.3267	28.5	39.6	38.6414	40.5586
CANADA	439	62	97.627	31.6036	88.3	87.67	88.93
SWEDEN	416	45	0.0032655	22.5264	0	0	0
NETHERLANDS	408	53	27.7478	26.9142	14.1	13.4179	14.7821
AUSTRALIA	347	54	85.4215	33.2795	95.8	95.4068	96.1932
SWITZERLAND	320	61	99.9975	41.7375	100	100	100
SPAIN	244	39	1.54489	22	0	0	0
BELGIUM	169	40	83.2853	30.1894	66.3	65.3735	67.2265
DENMARK	148	32	6.22499	21.473	0.4	0.276287	0.523713
ISRAEL	140	33	24.1913	27.4857	33.9	32.9722	34.8278
SCOTLAND	130	33	42.5238	25.1231	12	11.3631	12.6369
FINLAND	122	30	13.3252	25.9098	21.8	20.9907	22.6093
AUSTRIA	121	31	27.5783	23.0909	3.8	3.42526	4.17474
BRAZIL	116	29	11.1477	21.6638	1.5	1.26176	1.73824
NORWAY	107	27	5.47129	21.8224	1.8	1.53942	2.06058
INDIA	84	17	4.59858e-06	11.1667	0	0	0
CHINA	76	21	0.861737	18.3553	0.3	0.192808	0.407192
SOUTH KOREA	69	18	0.02796	14.6522	0	0	0
ARGENTINA	65	16	0.0011724	16.1538	0	0	0
POLAND	51	15	0.0537554	13.0588	0	0	0
MEXICO	50	21	59.0964	23.3	16.1	15.3796	16.8204
GREECE	48	20	47.709	23.4583	16.7	15.969	17.431
TAIWAN	47	16	1.38681	18.6596	1.5	1.26176	1.73824
THAILAND	45	20	62.9267	25.1556	29.3	28.4079	30.1921
IRELAND	44	21	84.1365	37.7727	91.6	91.0563	92.1437
HUNGARY	42	17	17.3347	24.0238	23.6	22.7677	24.4323
RUSSIA	39	14	1.02701	18.7692	3	2.66565	3.33435
SOUTH AFRICA	39	19	73.1299	26.4615	39	38.044	39.956
CZECH REPUBLIC	34	15	19.2296	16.5882	1.5	1.26176	1.73824
NEW ZEALAND	33	16	45.2106	25.5454	34.8	33.8664	35.7336
WALES	26	13	27.2258	22.8846	24.1	23.2617	24.9383
KENYA	26	18	99.3574	37	86.4	85.7281	87.0719
TURKEY	23	9	0.398316	12.7826	0.2	0.112434	0.287566
CUBA	21	11	22.3041	23.5714	27	26.1298	27.8702
PORTUGAL	20	13	81.0908	20.35	14	13.3199	14.6801

## Sheet: 5.Clinical Medicine
Country	number papers	h-index	percentile h	mean citation	percentile mean	confidence interval	confidence interval
USA	56463	284	100	24.7112	100	100	100
JAPAN	14699	124	0	14.4927	0	0	0
GERMANY	13822	144	16.68	16.7443	0	0	0
ENGLAND	13243	162	99.99	22.2218	100	100	100
FRANCE	9556	140	99.4546	17.7622	37.6	36.6506	38.5494
ITALY	7471	140	100	21.1182	100	100	100
CANADA	6297	143	100	26.0514	100	100	100
NETHERLANDS	4789	123	100	25.5151	100	100	100
SPAIN	4093	91	1.53592	14.9656	0	0	0
AUSTRALIA	4081	107	99.5281	21.8819	100	100	100
SWEDEN	4030	114	99.9998	24.8993	100	100	100
SWITZERLAND	3080	105	99.9999	23.8195	100	100	100
BELGIUM	2470	94	99.9856	21.917	99.7	99.5928	99.8072
AUSTRIA	2100	73	8.43559	16.8438	11.4	10.7771	12.0229
SCOTLAND	2016	90	99.9988	24.9668	100	100	100
ISRAEL	1961	71	7.55175	17.4768	33.9	32.9722	34.8278
FINLAND	1946	92	100	27.2682	100	100	100
DENMARK	1841	86	99.9927	24.7523	100	100	100
CHINA	1833	57	0	14.1211	0	0	0
TAIWAN	1616	52	0	12.4666	0	0	0
TURKEY	1582	34	0	7.36346	0	0	0
INDIA	1410	38	0	9.57447	0	0	0
BRAZIL	1300	51	0	13.3046	0	0	0
NORWAY	1187	71	99.7566	23.7321	99.8	99.7124	99.8876
RUSSIA	1141	32	0	3.85101	0	0	0
GREECE	1037	49	0.004	14.0868	0	0	0
SOUTH KOREA	1001	47	0	14.0899	0	0	0
NEW ZEALAND	712	53	77.2	25.7683	99.9	99.8381	99.9619
SOUTH AFRICA	694	40	0	14.6744	0.6	0.448635	0.751365
WALES	629	55	98.69	23.6757	99.2	99.0254	99.3746
POLAND	614	36	0	12.9267	0	0	0
SAUDI ARABIA	605	26	0	5.7124	0	0	0
IRELAND	575	47	47.37	18.2452	65.5	64.5683	66.4317
ARGENTINA	563	39	0.07	14.9272	2	1.7256	2.2744
MEXICO	485	35	0	13.2949	0.1	0.0380504	0.16195
NORTH IRELAND	384	44	94.16	28.2578	99.7	99.5928	99.8072
HUNGARY	384	36	5.4	16.4245	24.1	23.2617	24.9383
SINGAPORE	333	33	2.5	16.5165	28.8	27.9125	29.6875
CHILE	323	32	1.8	22.5046	95	94.5728	95.4272
CZECH REPUBLIC	290	30	0.06	13.7828	1.5	1.26176	1.73824

## Sheet: 6.Microbiology
Country	number of papers	h-index	percentile h	mean citation	percentile mean	confidence interval	confidence interval
USA	3926	113	100	30.9175	100	100	100
GERMANY	1274	75	99.5263	26.0377	100	100	100
JAPAN	1165	51	1.84821e-10	16.6403	0	0	0
ENGLAND	1009	67	91.7372	25.1536	98.9	98.6956	99.1044
FRANCE	975	65	83.235	24.2749	94.9	94.4688	95.3312
SPAIN	489	44	0.559249	19.0634	0.1	0.0380504	0.16195
CANADA	472	52	92.3334	23.1059	66.2	65.2729	67.1271
AUSTRALIA	422	45	17.8372	20.8815	14.7	14.006	15.394
ITALY	410	40	0.112899	16.6268	0	0	0
NETHERLANDS	378	50	98.4096	27.3757	99.2	99.0254	99.3746
RUSSIA	360	28	6.95583e-16	6.93056	0	0	0
SWITZERLAND	268	52	100	39.1604	100	100	100
SCOTLAND	258	42	89.1452	23.4922	74.1	73.2414	74.9586
SOUTH KOREA	250	23	1.5933e-15	9.232	0	0	0
SWEDEN	249	41	85.1215	24.1084	80.1	79.3175	80.8825
BELGIUM	220	41	96.8951	26.8682	96.6	96.2448	96.9552
BRAZIL	217	26	2.49387e-06	12.7834	0	0	0
DENMARK	195	37	82.4571	24.7128	83.9	83.1796	84.6204
INDIA	172	18	1.54731e-15	10.0116	0	0	0
MEXICO	109	22	0.234397	15.4862	0.1	0.0380504	0.16195
ISRAEL	109	27	41.8619	23.3303	66.2	65.2729	67.1271
FINLAND	98	34	99.9919	29.6225	96.5	96.1398	96.8602
TAIWAN	96	19	0.0131263	13.2396	0	0	0
CZECH REPUBLIC	93	18	0.00278747	11.0968	0	0	0
AUSTRIA	90	26	67.6978	23.2889	63.1	62.1542	64.0458
ARGENTINA	85	20	1.00337	14.8	0.2	0.112434	0.287566
CHINA	79	22	20.3838	17.5823	7	6.49991	7.50009
SOUTH AFRICA	72	19	3.08408	14.3611	0.4	0.276287	0.523713
NORWAY	68	26	98.1943	24.0882	70	69.1018	70.8982
SLOVAKIA	67	14	0.000420772	10.6866	0	0	0
POLAND	66	14	0.000645005	14.5	0.3	0.192808	0.407192
NEW ZEALAND	65	20	23.4574	17.2615	7.5	6.98375	8.01625
WALES	63	20	29.3452	23.6191	66.3	65.3735	67.2265
IRELAND	57	25	99.5411	29.4211	93.3	92.81	93.79
HUNGARY	56	16	1.65488	13	0.1	0.0380504	0.16195
THAILAND	41	14	5.28949	15.561	5.2	4.76483	5.63517
SINGAPORE	37	16	56.4787	15.8649	5.2	4.76483	5.63517
NORTH IRELAND	33	16	78.154	25.9394	79.1	78.3031	79.8969
PORTUGAL	33	12	4.47297	16.0606	9.1	8.53629	9.66371
EGYPT	32	7	9.46705e-06	8.21875	0	0	0

## Sheet: 7.Neuroscience&Behavior
Country	number of papers	h-index	percentile h	mean citation	percentile mean	confidence interval	confidence interval
USA	9548	181	100	34.794	100	100	100
JAPAN	2291	76	1.5261e-12	19.6098	0	0	0
GERMANY	2155	94	30.7182	27.5568	89.1	88.4892	89.7108
ENGLAND	1821	109	100	33.8133	100	100	100
FRANCE	1474	81	14.4031	24.5617	1.7	1.44663	1.95337
CANADA	1388	89	98.6313	29.4474	99.5	99.3618	99.6382
ITALY	1320	66	2.3113e-05	20.5099	0	0	0
SWEDEN	675	63	55.844	27.8282	82.8	82.0603	83.5397
SPAIN	626	48	2.44504e-05	19.599	0	0	0
NETHERLANDS	620	59	27.7395	24.95	13.8	13.124	14.476
AUSTRALIA	525	49	0.122593	23.2686	2.2	1.9125	2.4875
SWITZERLAND	486	57	73.7107	31.4321	99.3	99.1366	99.4634
BRAZIL	301	30	8.18042e-11	11.7143	0	0	0
ISRAEL	298	46	60.9349	25.9933	41.5	40.5343	42.4657
SCOTLAND	282	46	75.2351	27.8972	74.8	73.949	75.651
BELGIUM	260	41	23.2494	22.1769	2.3	2.00619	2.59381
FINLAND	247	44	80.7122	29.1538	85.7	85.0139	86.3861
AUSTRIA	225	44	93.5975	29.1689	85.2	84.504	85.896
DENMARK	214	40	61.0863	25.8692	42.7	41.7305	43.6695
INDIA	196	21	6.45984e-16	8.05102	0	0	0
RUSSIA	192	26	1.86866e-06	11.9948	0	0	0
POLAND	188	22	1.83293e-12	11.3085	0	0	0
CHINA	185	32	1.24675	18.3243	0	0	0
HUNGARY	170	33	11.896	22.1	4.3	3.9024	4.6976
SOUTH KOREA	134	30	17.0463	20.9478	2.7	2.38232	3.01768
TAIWAN	129	26	0.443409	16.1783	0	0	0
NORWAY	112	34	97.6687	34.5268	97.5	97.194	97.806
MEXICO	106	23	0.238037	14.5	0	0	0
ARGENTINA	98	22	0.227756	17.7347	0.1	0.0380504	0.16195
NEW ZEALAND	87	27	66.2614	21.4598	8.8	8.24474	9.35526
WALES	84	29	94.2313	29.0119	75.9	75.0617	76.7383
TURKEY	77	19	0.161157	13.7922	0	0	0
CZECH REPUBLIC	58	19	11.3372	19.431	6.6	6.11337	7.08663
IRELAND	55	21	57.3044	25.4182	44.7	43.7255	45.6745
UKRAINE	54	10	3.5787e-09	4.44444	0	0	0
GREECE	49	15	0.569296	16.2857	0.7	0.53659	0.86341
CHILE	48	17	11.1671	27.8958	63	62.0537	63.9463
PORTUGAL	47	16	4.49928	22.7021	26.1	25.2392	26.9608
BULGARIA	36	14	8.27491	14.4167	0.6	0.448635	0.751365
NORTH IRELAND	33	15	38.5931	17.3333	4.8	4.38102	5.21898

## Sheet: 8.Space Science
Country	number of papers	h-index	percentile h	mean citation	percentile mean	confidence interval	confidence interval
USA	3477	100	100	25.8801	100	100	100
GERMANY	1233	70	99.9586	21.6504	97.9	97.619	98.181
ENGLAND	1105	70	99.9988	25.8498	100	100	100
FRANCE	1030	60	75.8303	18.2485	72.5	71.6248	73.3752
ITALY	772	56	92.8025	18.0402	67.2	66.2798	68.1202
RUSSIA	721	35	2.17637e-11	8.08322	0	0	0
JAPAN	649	44	1.72644	14.4114	0.5	0.361754	0.638246
SPAIN	427	38	6.11046	15.7541	12.8	12.1452	13.4548
NETHERLANDS	364	47	99.9483	21.3214	92.7	92.1901	93.2099
CANADA	346	48	99.9962	24.4884	96	95.6159	96.3841
AUSTRALIA	317	45	99.9681	22.1956	93.8	93.3273	94.2727
INDIA	219	22	5.35921e-05	8.66667	0	0	0
CHINA	208	26	0.970859	10.6779	0	0	0
BRAZIL	174	28	41.5263	15.1667	18.1	17.3454	18.8546
POLAND	164	29	73.2312	15.8354	32	31.0857	32.9143
MEXICO	159	24	4.26213	16.9308	48.1	47.1207	49.0793
SWEDEN	154	30	92.5276	20.2857	85.2	84.504	85.896
SCOTLAND	148	28	76.8648	17.2838	54.3	53.3236	55.2764
SWITZERLAND	145	33	99.8893	25.6621	96.7	96.3499	97.0501
DENMARK	124	34	99.9993	27.1532	98	97.7256	98.2744
BELGIUM	120	23	28.183	16.1333	37.5	36.5511	38.4489
FINLAND	120	25	66.0743	16.6583	46.1	45.123	47.077
CHILE	117	30	99.8464	23.0427	93.7	93.2238	94.1762
UKRAINE	111	17	0.0276931	10.5586	0.1	0.0380504	0.16195
AUSTRIA	99	18	1.37512	10.8283	0.4	0.276287	0.523713
ISRAEL	85	22	78.8908	22.0471	90.4	89.8226	90.9774
SOUTH AFRICA	85	23	90.3011	18.5412	70.3	69.4044	71.1956
ARGENTINA	80	21	72.0593	17.6375	61.4	60.4458	62.3542
CZECH REPUBLIC	77	16	2.42426	11.3377	2	1.7256	2.2744
NORWAY	67	21	93.2687	19.2985	75.4	74.5559	76.2441
GREECE	60	16	25.1467	14.0333	21.8	20.9907	22.6093
NORTH IRELAND	60	15	10.5817	11.9	6.9	6.40323	7.39677
HUNGARY	52	17	72.9107	13.9808	23.8	22.9653	24.6347
SOUTH KOREA	48	14	24.8821	12.7917	14.4	13.7119	15.0881
WALES	46	18	96.0836	17.5	59.9	58.9394	60.8606
BULGARIA	38	8	0.0307338	4.73684	0	0	0
IRELAND	34	15	93.2837	17.0882	58.2	57.2333	59.1667
NEW ZEALAND	33	12	44.9778	13.7879	26.9	26.0309	27.7691
PORTUGAL	24	11	73.8557	15.5417	46.2	45.2228	47.1772
SERBIA & MONTENEGRO	23	7	3.00931	5.43478	0.1	0.0380504	0.16195

## Sheet: 9.Physics
Country	number of papers	h-index	percentile h	mean citation	percentile mean	confidence interval	confidence interval
USA	18267	173	100	19.5191	100	100	100
JAPAN	9600	99	5.4	11.9556	36.4	36.1018	36.6982
GERMANY	9598	114	99.9	15.5419	100	100	100
RUSSIA	8116	75	0	7.49482	0	0	0
FRANCE	6056	97	99	15.1015	100	100	100
ENGLAND	4890	90	99.3	14.6783	100	100	100
CHINA	4294	59	0	7.80438	0	0	0
ITALY	4086	81	87.7	14.4036	100	100	100
INDIA	2239	45	0	8.40152	0	0	0
SPAIN	2089	67	98.4	15.1503	100	100	100
SWITZERLAND	2028	81	100	21.964	100	100	100
SOUTH KOREA	1911	51	0	9.77499	0	0	0
CANADA	1895	61	76.4	14.9784	99.9	99.8804	99.9196
POLAND	1794	52	0.9	12.1154	59.3	58.9955	59.6045
NETHERLANDS	1504	61	99.3	14.5997	99.6	99.5609	99.6391
BRAZIL	1481	46	0	9.42336	0	0	0
AUSTRALIA	1373	49	6.8	11.6934	35	34.7044	35.2956
ISRAEL	1330	56	94.9	15.1887	99.6	99.5609	99.6391
SWEDEN	1250	52	68.1	15.7184	99.7	99.6661	99.7339
UKRAINE	1250	29	0	4.9736	0	0	0
TAIWAN	1160	39	0	7.73965	0	0	0
BELGIUM	933	48	82.8	14.0075	95.1	94.9662	95.2338
AUSTRIA	751	47	98	16	99	98.9383	99.0617
DENMARK	746	55	100	19.5778	99.9	99.8804	99.9196
MEXICO	692	29	0	7.64884	0	0	0
CZECH REPUBLIC	599	32	0.2	9.26377	0.2	0.172309	0.227691
SCOTLAND	597	42	94.6	18.4724	99.9	99.8804	99.9196
FINLAND	558	38	65.8	16.6398	98.8	98.7325	98.8675
GREECE	546	35	22.7	12.7491	75.3	75.0327	75.5673
ARGENTINA	526	34	0	10.5266	8.4	8.22807	8.57193
HUNGARY	483	36	67.7	12.412	64.9	64.6042	65.1958
ROMANIA	394	29	6.2	9.55584	1.5	1.42466	1.57534
BELARUS	340	21	0	5.84118	0	0	0
PORTUGAL	296	25	3.7	10.3615	12.1	11.8979	12.3021
TURKEY	296	23	0.2	9.08784	1.2	1.13251	1.26749
SLOVAKIA	293	27	22.7	10.8191	26.8	26.5255	27.0745
BULGARIA	280	24	2.6	9.84286	5.5	5.3587	5.6413
SINGAPORE	278	27	32.8	9.7518	6.6	6.44611	6.75389
NORWAY	248	29	87.4	12.2943	60.3	59.9967	60.6033
SOUTH AFRICA	217	23	16.3	10.8894	30.8	30.5139	31.0861

[truncated: 12 more sheets: 10. ComputerScience, 11.Mathematics, 12.Chemistry, 13.Geosciences, 14.Agricultural Sciences, 15.Material Science, 16. Plant&Animal Science, 17.EnvironmentEcology, 18.Economics&Business, 19.Engineering, 20.Psychiatry, Social Sciences]
